# Supplementary material for: Sociodemographic and health-(care-)related characteristics of online health information seekers: a cross-sectional German study
Source: Springer Nature journal article supplement (doi:10.1186/s12889-015-1423-0), 2015-01-28
Supplement: MOESM1 [file 9748670]

**Additional file 1: Assessment of variables**

| Variable                                                        | Assessment in Questionnaire                                                                                                                    | Categories of Evaluation                                                                                                                                                                                                                                                                                                                                                                                             |
|-----------------------------------------------------------------|------------------------------------------------------------------------------------------------------------------------------------------------|----------------------------------------------------------------------------------------------------------------------------------------------------------------------------------------------------------------------------------------------------------------------------------------------------------------------------------------------------------------------------------------------------------------------|
| General Internet use                                            | Do you use the Internet, at least now and again (for any reason whatsoever)?                                                                   | Yes<br>No                                                                                                                                                                                                                                                                                                                                                                                                            |
| HISB on the Internet                                            | Do you use the Internet to search for information on medical or health issues?                                                                 | Yes<br>No                                                                                                                                                                                                                                                                                                                                                                                                            |
| Reasons for HISB on the Internet                                | For which purposes do you search for health information on the Internet?                                                                       | <ul style="list-style-type: none"> <li>• I am sick (information on illness and treatment options)</li> <li>• Another person is sick (information on illness and treatment options)</li> <li>• Look up symptoms</li> <li>• Alternative treatments</li> <li>• Health-related topic discussed in the media</li> <li>• Second medical opinion</li> <li>• Information about health insurance</li> <li>• Others</li> </ul> |
| Use of other sources for health information (Internet excluded) | Do you use other sources to search for information on medical or health issues?                                                                | Yes<br>No                                                                                                                                                                                                                                                                                                                                                                                                            |
| Sources for health information (Internet excluded)              | Which other sources do you use?                                                                                                                | <ul style="list-style-type: none"> <li>• Physician</li> <li>• Pharmacy</li> <li>• Health insurance company</li> <li>• Family/friends</li> <li>• Magazines</li> <li>• Professional literature</li> <li>• Television</li> <li>• Others</li> </ul>                                                                                                                                                                      |
| Age (calculated)                                                | In which year and month are you born?                                                                                                          | 18-29 years<br>30-44 years<br>45-59 years<br>60 years and over                                                                                                                                                                                                                                                                                                                                                       |
| Gender                                                          | Please state your gender                                                                                                                       | male<br>female                                                                                                                                                                                                                                                                                                                                                                                                       |
| Parents' country of birth                                       | Is one of your parents, mother or father, not born in Germany?                                                                                 | Yes, my ...<br>No                                                                                                                                                                                                                                                                                                                                                                                                    |
| Country of birth                                                | Are you born in Germany?                                                                                                                       | Yes<br>No                                                                                                                                                                                                                                                                                                                                                                                                            |
| Employment status                                               | Are you currently employed? If so, to which extent of working hours?                                                                           | <ul style="list-style-type: none"> <li>• No</li> <li>• Full-time (35 hours/week and more)</li> <li>• Part-time (under 35 hours/week)</li> </ul>                                                                                                                                                                                                                                                                      |
| Parenthood                                                      | How many people under the age of 15 are living in your household permanently?                                                                  | 0<br>1-2<br>3 or more                                                                                                                                                                                                                                                                                                                                                                                                |
| Marital status                                                  | What is your marital status?                                                                                                                   | Married<br>Divorced<br>Widowed<br>Single                                                                                                                                                                                                                                                                                                                                                                             |
| Partnership status                                              | Do you have a life partner?                                                                                                                    | Yes<br>No                                                                                                                                                                                                                                                                                                                                                                                                            |
| Town size (calculated)                                          | Where do you live (town)?                                                                                                                      |                                                                                                                                                                                                                                                                                                                                                                                                                      |
| Self-perceived health                                           | How would you describe your health status in general?                                                                                          | Very good<br>Good<br>Moderate<br>Poor<br>Very poor                                                                                                                                                                                                                                                                                                                                                                   |
| Chronic disease(s)                                              | Do you suffer from one or several chronic diseases? (Annotation: They are long-term illnesses that require permanent medical care and control) | Yes<br>No                                                                                                                                                                                                                                                                                                                                                                                                            |
| Health insurance status                                         | Do you have a statutory or private health insurance?                                                                                           | Private<br>Statutory<br>No insurance                                                                                                                                                                                                                                                                                                                                                                                 |

|                      |                                                                                                                                                                                                                                                                                                                                                                                                                                         |                                            |
|----------------------|-----------------------------------------------------------------------------------------------------------------------------------------------------------------------------------------------------------------------------------------------------------------------------------------------------------------------------------------------------------------------------------------------------------------------------------------|--------------------------------------------|
| Physician visits     | Did you visit a resident physician as a patient (except for dentists) in the last 3 months?                                                                                                                                                                                                                                                                                                                                             | No<br>Yes, once<br>Yes, several times      |
| Hospital nights      | How many nights did you spend in a hospital as a patient in the last 12 months?                                                                                                                                                                                                                                                                                                                                                         | 0 nights<br>1-7 nights<br>8 nights or more |
| Aggregated variables | <ul style="list-style-type: none"> <li>• <i>Migration background</i>: country of birth &amp; parents' country of birth</li> <li>• <i>Use of health care services</i>: physician visits &amp; hospital nights</li> <li>• <i>Relationship status</i>: marital status &amp; partnership status</li> <li>• <i>Social class</i>: educational attainment (graduation, training) &amp; household income &amp; occupational position</li> </ul> |                                            |
